# Supplementary material
Source: PubMed Central journal article supplement (PMC3402001)
Supplement: emmm0003-0050-SD1.pdf [file emmm0003-0050-SD1.pdf]

## Supplementary Table and Figure Legends

### **Table S1. Genes contained in rearrangement region**

MGI symbol, name, and genomic position of annotated genes located within the Df11(1) and Dp11(1) region (reference strain C57Bl/6J, NCBI m7 mouse assembly, April 2007).

### **Table S2. Altered anxiety in Dp11(1) and Df11(1) mice**

Measures from the elevated plus maze (EPM) and open field (OF) in Dp11(1)/+, wild-type, and Df11(1) littermates demonstrated a significant positive gene dosage effect for % time in open arms (EPM) and trend for positive gene dosage effect for distance travelled in open arms (EPM), number of entries in center (OF), and total distance travelled (OF; mean  $\pm$  SEM; Df11(1), N = 15-17; WT, N = 23, Dp11(1), N = 12. \* P < 0.05; OA = open arms; Ce = center).

### **Figure S1. Breeding strategy for phenotyping cohort**

Chimeric mice were derived from blastocyst injection of Dp11(1)/Df11(1) ES cells and bred with C57BL/6J mice to obtain Df11(1)/+ and Dp11(1)/+ 129/SvEvBrdxC57BL/6J animals (top row). Dp11(1)/+ and Df11(1)/+ females were bred to 129/SvEvBrd males to produce female Dp11(1)/+ and Df11(1)/+ mice (second row) that were crossed to either *ApoE*<sup>KO</sup>/*ApoE*<sup>KO</sup> or *Apc*<sup>Min</sup>/+ females to produce the phenotyping cohorts (last row, C57BL/6J x [129/SvEvBrd;C57BL/6] background).

### **Figure S2. Flow cytometry of splenic T cells**

Flow cytometric analysis of splenocytes from aneuploidy animals revealed significant changes in the percentage of CD8+, but not CD4+ cells (mean  $\pm$  SEM; Df11(1)/+, N = 4; WT, N = 4; Dp11(1)/+, N = 4; \* P < 0.05).

### **Figure S3. Time course of glucose tolerance test**

Blood glucose levels at 15, 30, 60, and 120 min after administration of dextrose (2 mg/g, i.p.) for (A) animals maintained on a high fat diet for 14 weeks, or (B) age matched controls kept on a normal diet.

**Figure S4. Immunoblotting of Stat5 and Stat3 protein in liver tissue**

(A) Representative immunoblots showing levels of Stat3, Stat5 and gamma globulin protein in total liver extracts of Df11(1)/+, WT, or Dp11(1)/+ animals. (B) Densitometric quantification of immunoreactivity revealed gene dosage dependent changes in normalized protein levels for Stat3 and Stat5 in Df11(1)/+, WT, and Dp11(1)/+ animals (Stat3, N = 2; Stat5, N = 2).

**Figure S5. Peripheral blood phenotype of Df11(1) and Dp11(1) mice on an ApoE wild-type background**

A significant positive gene dose dependent effect was observed for peripheral blood (A) white cells, and a trend for (B) platelets in Dp11(1)/+, wild-type, and Df11(1)/+ littermates at 12 weeks of age. All mice were wild-type at the *ApoE* locus. Flow cytometry revealed a trend for a positive gene dose dependent effect for percentage (F) CD8+, but not (C) B220+, (D) Mac1+, (E) CD4+ positive cells in peripheral blood (mean  $\pm$  SEM; Df11(1)/+, N = 4; WT, N = 10; Dp11(1)/+, N = 4\* P < 0.05, \*\* P < 0.01, \*\*\* P < 0.001).

**Figure S6. Time course of glucose tolerance test in Dp11(1)/+;Stat5ab<sup>KO</sup>/+ double mutant mice**

Blood glucose levels were measured at 15, 30, 60, and 120 min after administration of dextrose (2 mg/g, i.p.) for animals maintained on a normal diet. GTT was measured at the age of 14-16 weeks (mean  $\pm$  SEM; Dp11(1), N = 7; Dp11(1)/Stat5ab, N = 9; WT, N = 14; Stat5ab, N = 8; mean  $\pm$  SEM, \* P < 0.05).

**Figure S7. Contact hypersensitivity response in Dp11(1)/+;Stat5ab<sup>KO</sup>/+ double mutant mice.**

**(A)** A significant reduction of ear swelling was observed in heterozygous *Stat5ab* knockout mice when compared to wild-type animals and a trend for increased ear swelling was seen in Dp11(1)/+ mice and reversed in Dp11(1)/+;*Stat5ab*<sup>KO</sup>/+ double mutant littermates following local application of dinitro-fluoro-benzene (DNFB). Ear thickness was measured at 24, 48, and 72 hours following DNFB treatment in mice that had been sensitized by DNFB pre-treated on the abdomen 5 days earlier (mean ± SEM; Dp11(1), N = 7; Dp11(1)/Stat5ab, N = 9; WT, N = 10; Stat5ab, N = 8; \* P < 0.05, \*\* P < 0.01). **(B)** Regression analysis revealed a significant correlation between ear swelling following application of DNFB and peripheral white blood cell counts in mice (N = 34; R<sup>2</sup> = 0.641, P = 0.001).

| MGI symbol           | MGI name                                                     | Position (Ensembl-NCBI v37) |
|----------------------|--------------------------------------------------------------|-----------------------------|
| <b>Gast</b>          | Gastrin                                                      | 100,195-100,198 kb          |
| <b>Hap1</b>          | Huntingtin-associated protein 1                              | 100,208-100,217 kb          |
| <b>Jup</b>           | Junction plakoglobin                                         | 100,231-100,259 kb          |
| <b>1110036O03Rik</b> | 1110036O03Rik                                                | 100,269-100,276 kb          |
| <b>Fkbp10</b>        | FK506 binding protein 10                                     | 100,277-100,286 kb          |
| <b>Nt5c3l</b>        | 5'-nucleotidase, cytosolic III-like                          | 100,283-100,303 kb          |
| <b>Klhl10</b>        | Kelch-like 10 Drosophila                                     | 100,303-100,318 kb          |
| <b>Klhl11</b>        | Kelch-like 11 Drosophila                                     | 100,323-100,334 kb          |
| <b>Acly</b>          | ATP citrate lyase                                            | 100,337-100,389 kb          |
| <b>Ttc25</b>         | Tetratricopeptide repeat domain 25                           | 100,406-100,433 kb          |
| <b>Cnp</b>           | 2',3'-cyclic nucleotide 3' phosphodiesterase                 | 100,436-100,443 kb          |
| <b>Dnajc7</b>        | Dnaj (Hsp40) homolog, subfamily C, member 7                  | 100,444-100,480 kb          |
| <b>Nkiras2</b>       | NFKB inhibitor interacting Ras-like protein 2                | 100,480-100,488 kb          |
| <b>Zfp385c</b>       | Zinc finger protein 385C                                     | 100,488-100,518 kb          |
| <b>Dhx58</b>         | DEXH (Asp-Glu-X-His) box polypeptide 58                      | 100,556-100,565 kb          |
| <b>Kat2A</b>         | K(lysine) acetyltransferase 2A (GCN5)                        | 100,566-100,573 kb          |
| <b>Hspb9</b>         | Heat shock protein, alpha-crystallin-related, B9             | 100,575-100,575 kb          |
| <b>Rab5c</b>         | RAB5C, member RAS oncogene family                            | 100,576-100,599 kb          |
| <b>Kcnh4</b>         | Potassium voltage-gated channel, member 4                    | 100,601-100,621 kb          |
| <b>Ghdc</b>          | GH3 domain containing                                        | 100,627-100,632 kb          |
| <b>Hcrt</b>          | Hypocretin                                                   | 100,623-100,624 kb          |
| <b>Stat5b</b>        | Signal transducer and activator of transcription 5B          | 100,642-100,712 kb          |
| <b>Stat5a</b>        | Signal transducer and activator of transcription 5A          | 100,720-100,746 kb          |
| <b>Stat3</b>         | Signal transducer and activator of transcription 3           | 100,746-100,800 kb          |
| <b>Ptrf</b>          | Polymerase I and transcript release factor                   | 100,818-100,832 kb          |
| <b>Atp6v0a1</b>      | ATPase, H <sup>+</sup> transporting, lysosomal V0 subunit A1 | 100,870-100,925 kb          |
| <b>Naglu</b>         | Alpha-N-acetylglucosaminidase (San Filippo disease IIIB)     | 100,931-100,938 kb          |
| <b>Hsd17B</b>        | Hydroxysteroid (17-b) dehydrogenase                          | 100,939-100,941 kb          |

**Ermakova et al., Table S1**

| <b>Behavioral parameters</b>     | <b>Df11(1)</b> | <b>WT</b>    | <b>Dp11(1)</b> | <b>p value</b> |
|----------------------------------|----------------|--------------|----------------|----------------|
| <b><i>Elevated Plus Maze</i></b> |                |              |                |                |
| % time spent in OA               | 14.9 ± 3.1     | 10.1 ± 1.6   | 6.3 ± 1.3*     | 0.045          |
| No. of entries in OA             | 9.0 ± 1.03     | 10.0 ± 1.2   | 7.25 ± 1.15    | 0.313          |
| Distance travelled in OA (cm)    | 95.2 ± 20.7    | 70.7 ± 11.7  | 37.0 ± 7.54    | 0.051          |
| Total number of entries          | 25.8 ± 3.66    | 26.9 ± 2.45  | 18.9 ± 2.38    | 0.162          |
| Total distance travelled (cm)    | 535 ± 59.6     | 594 ± 36.9   | 474.0 ± 37.5   | 0.194          |
| <b><i>Open Field</i></b>         |                |              |                |                |
| Time spent in Ce (sec)           | 75.1 ± 24.4    | 68.4 ± 11.5  | 24.0 ± 6.3     | 0.121          |
| No. of entries in Ce             | 26.5 ± 7.50    | 27.3 ± 4.49  | 9.42 ± 2.74    | 0.082          |
| Distance travelled in Ce (sec)   | 387 ± 121      | 377 ± 77.1   | 117 ± 39       | 0.123          |
| Total distance travelled (cm)    | 5357 ± 569.8   | 4575 ± 431.2 | 3454 ± 506     | 0.065          |

Legends: OA: open arms; Ce: center. Data are presented as mean ± S.E.M

(Df11(1): n=15-17, WT: n=23, Dp11(1): n=12). \* $p < 0.05$ , D11(1) vs Dp

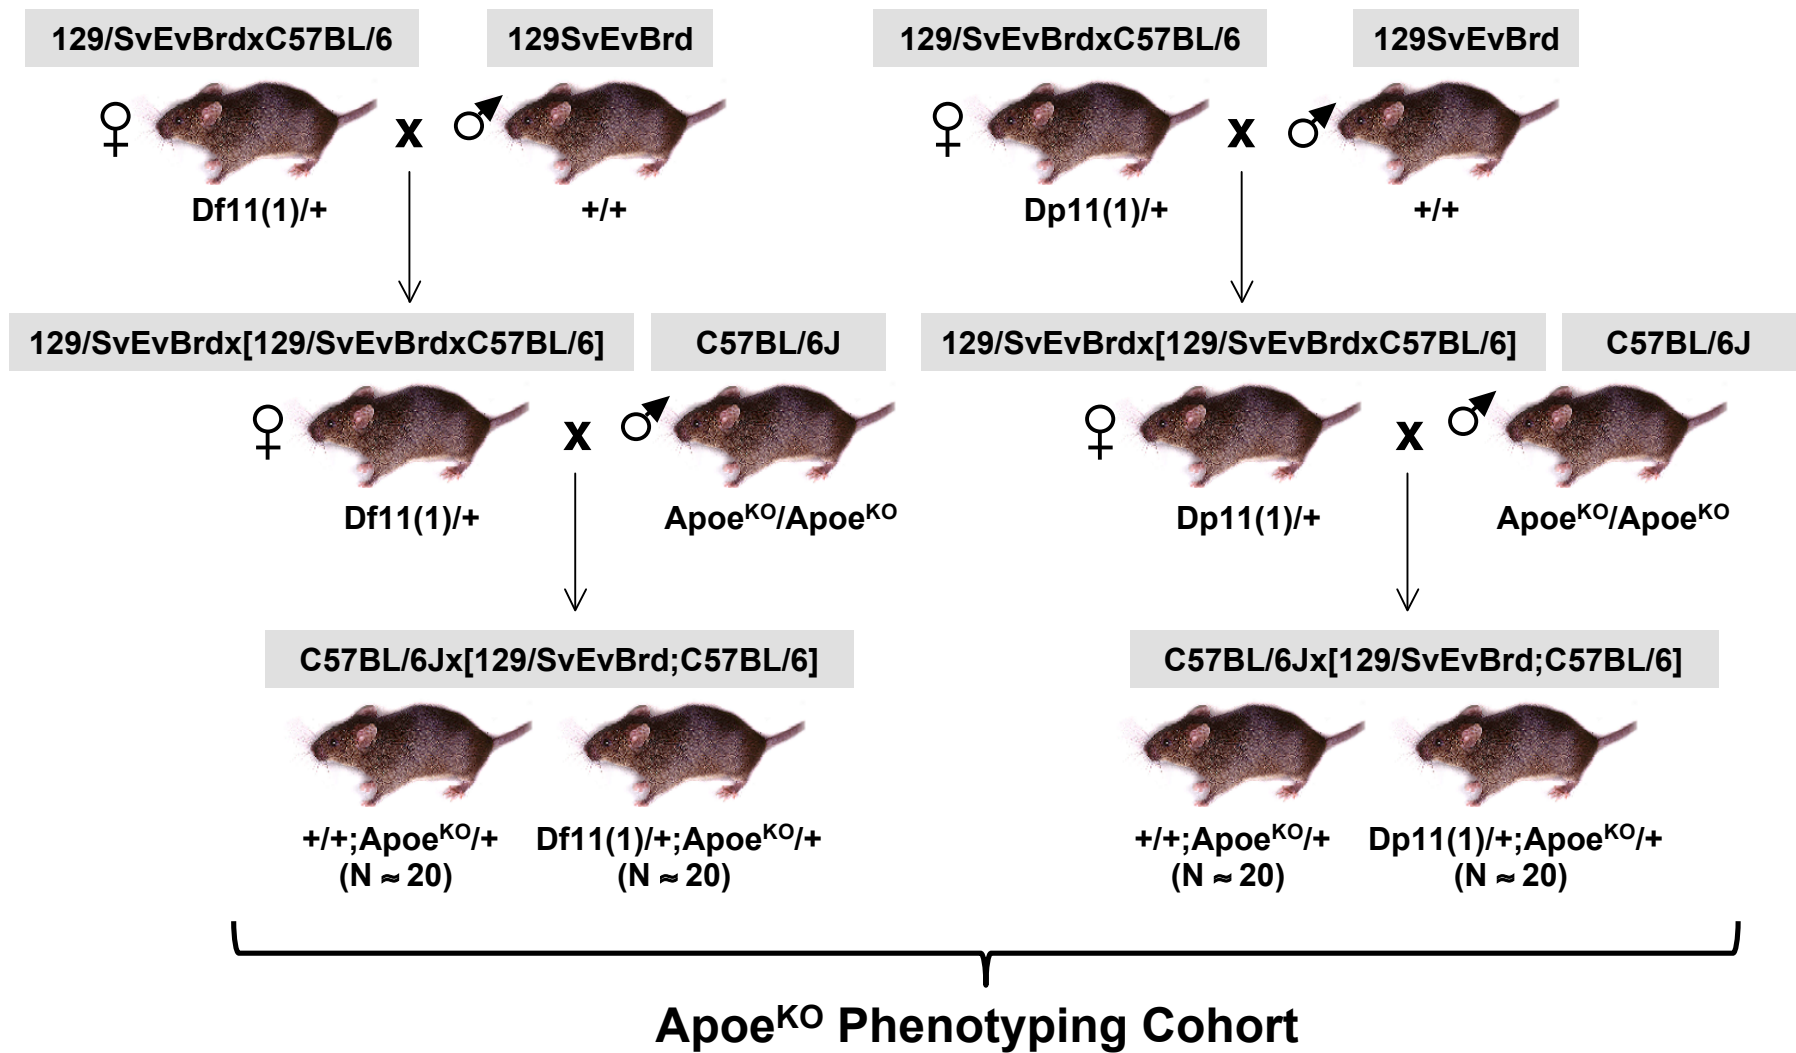

Ermakova et al., Figure S1

**A**

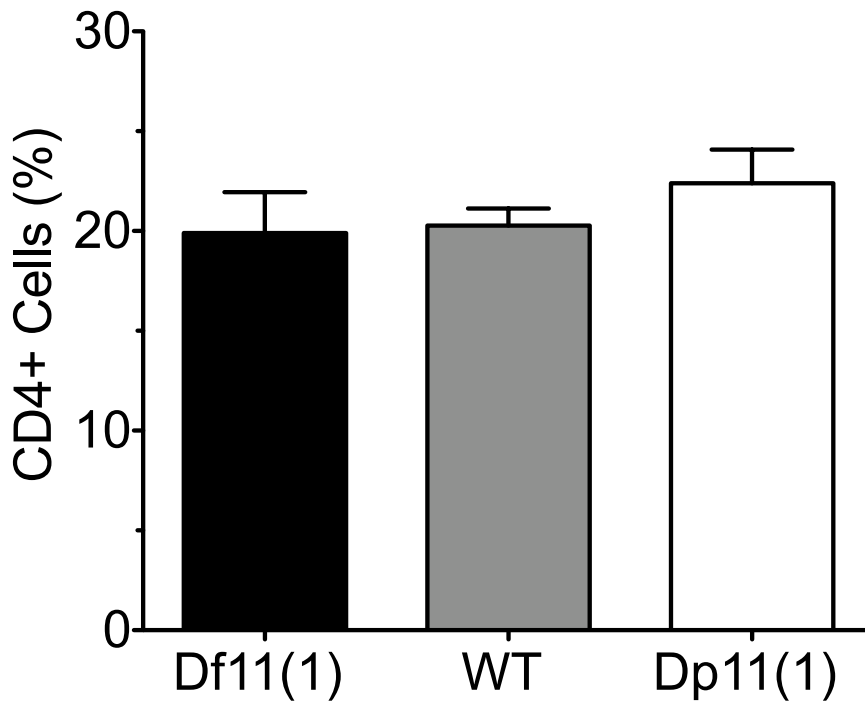

**B**

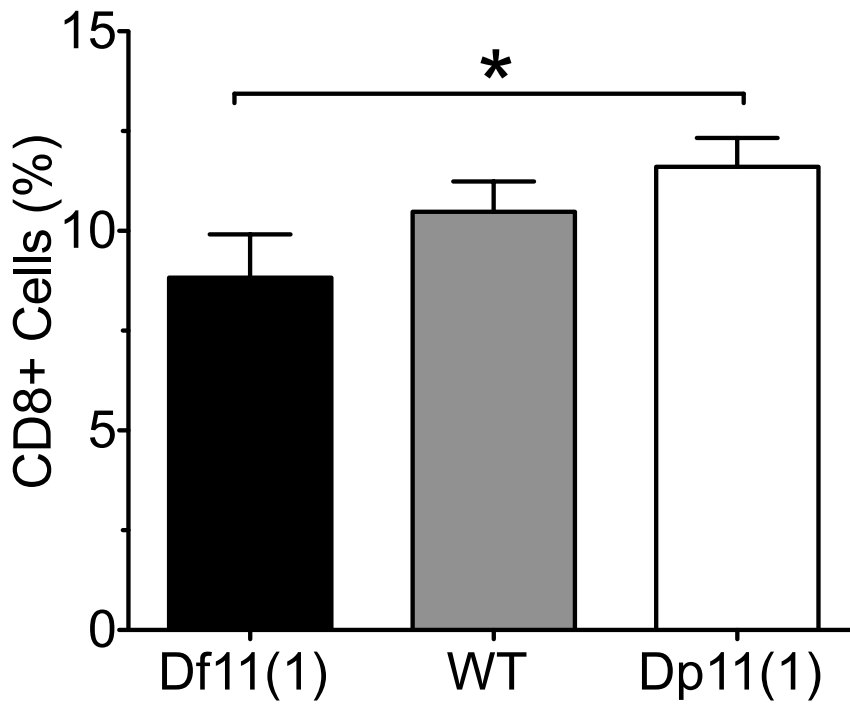

**A**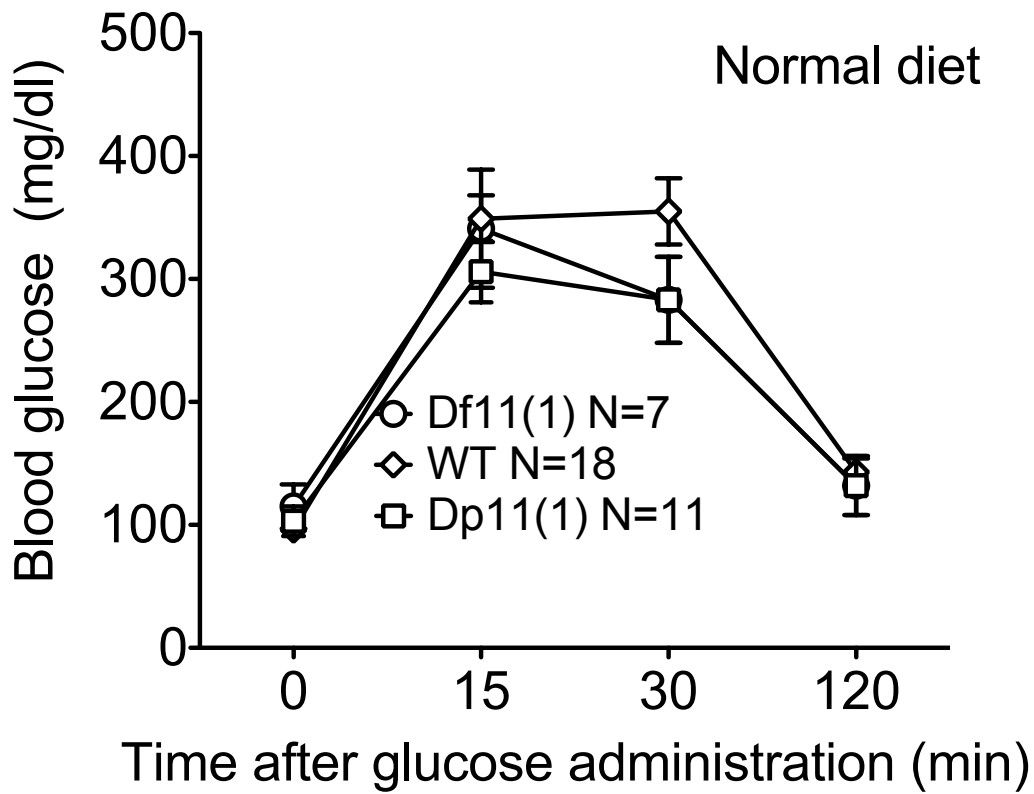**B**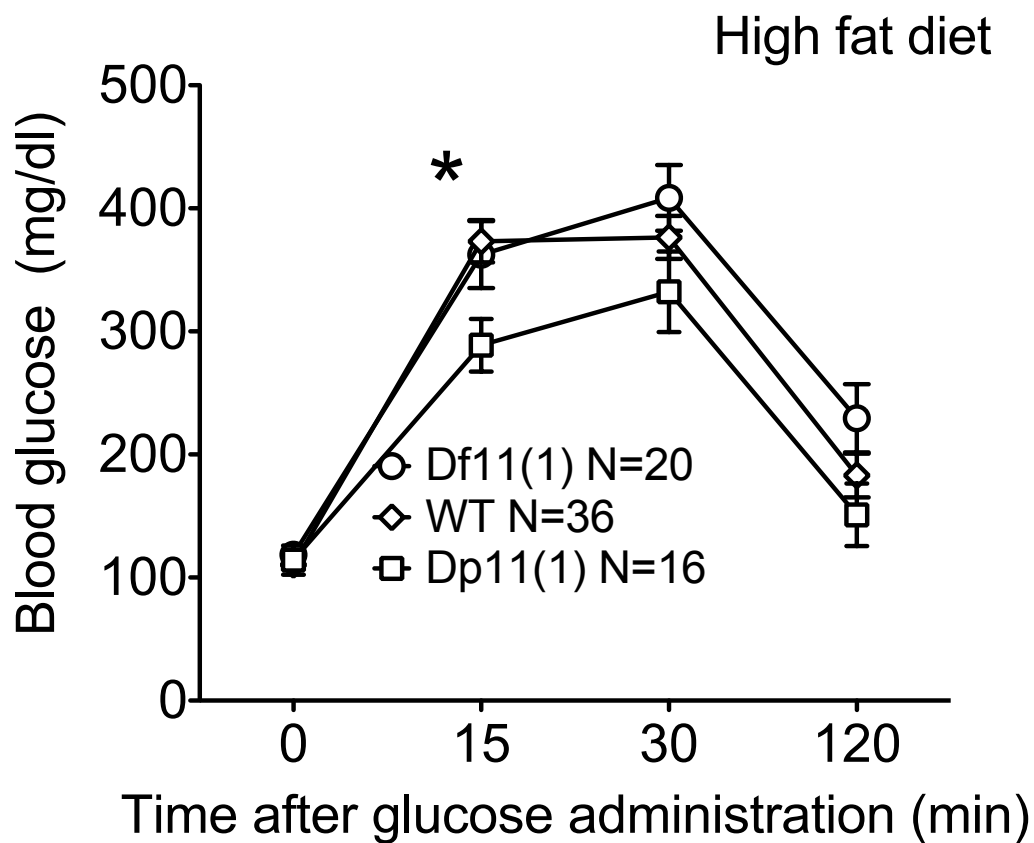



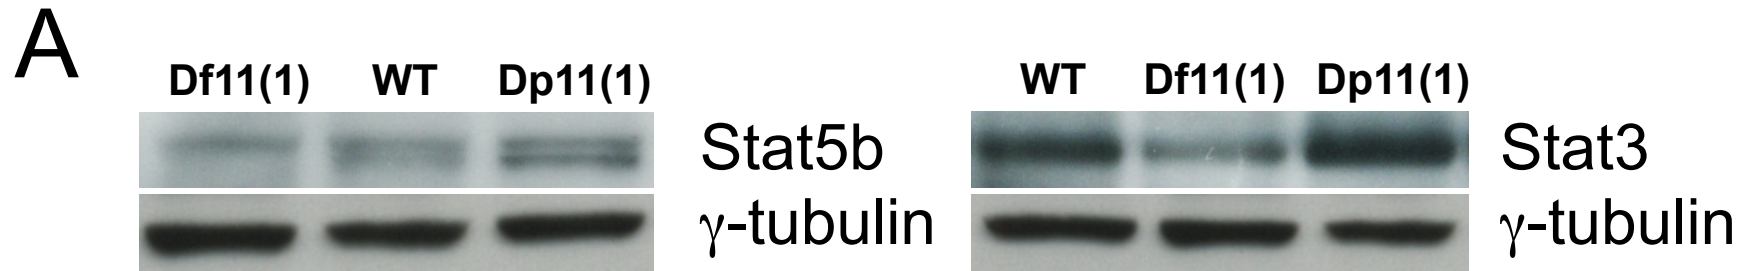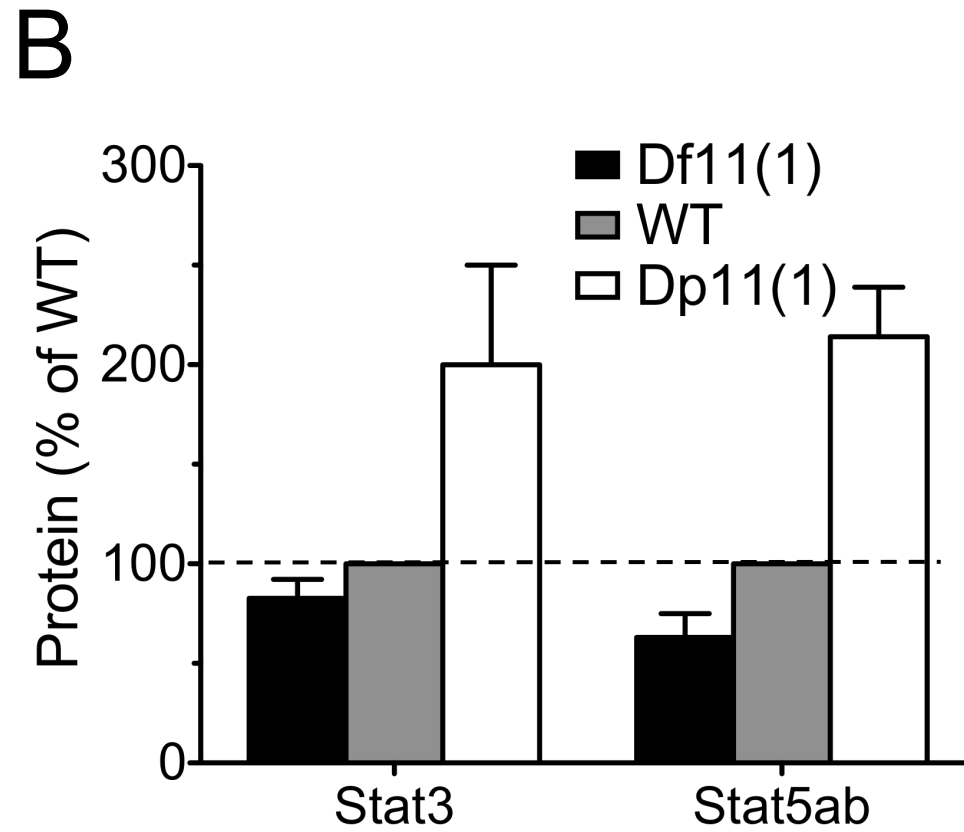

**A**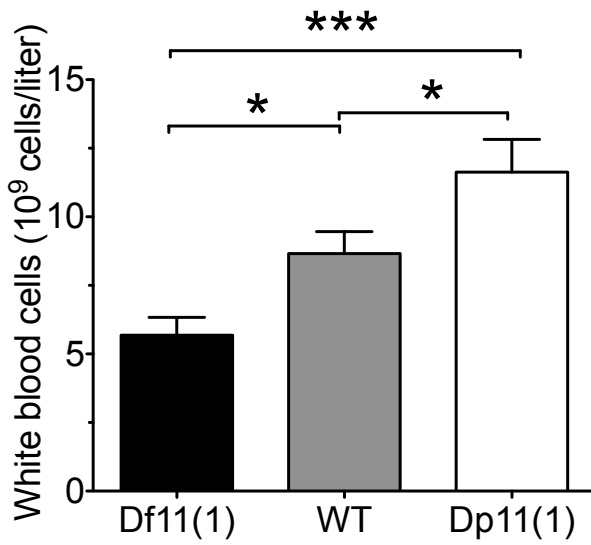**B**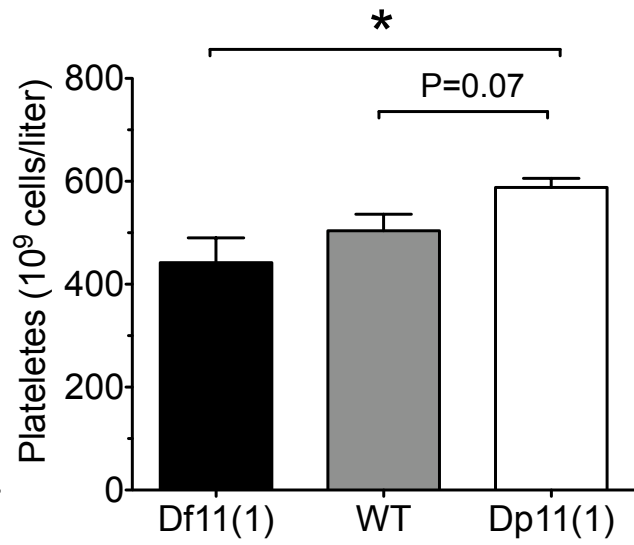**C**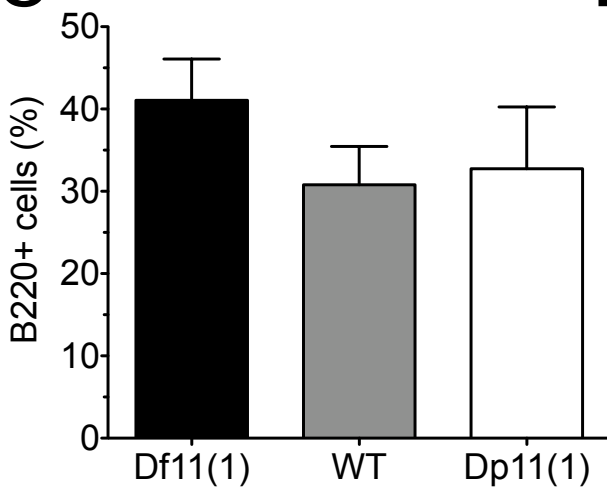**D**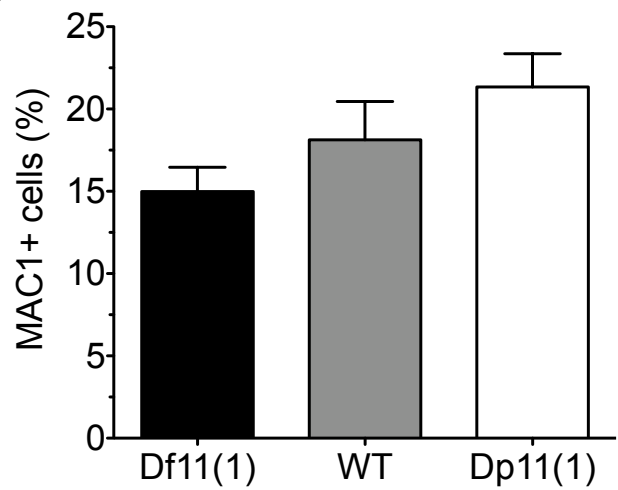**E**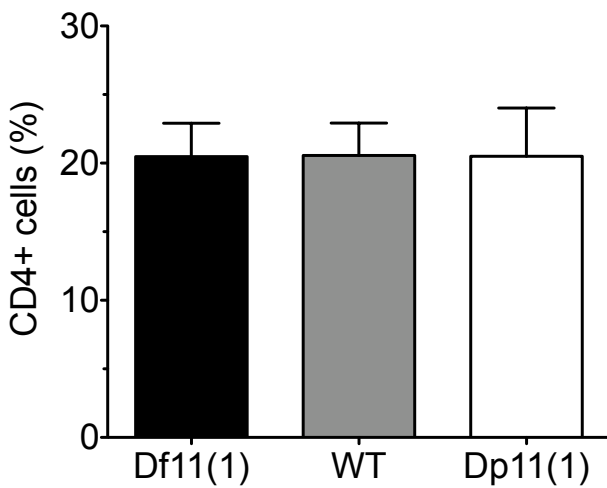**F**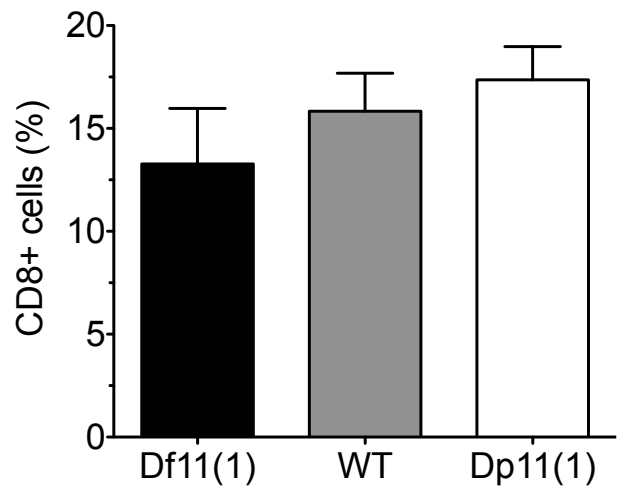

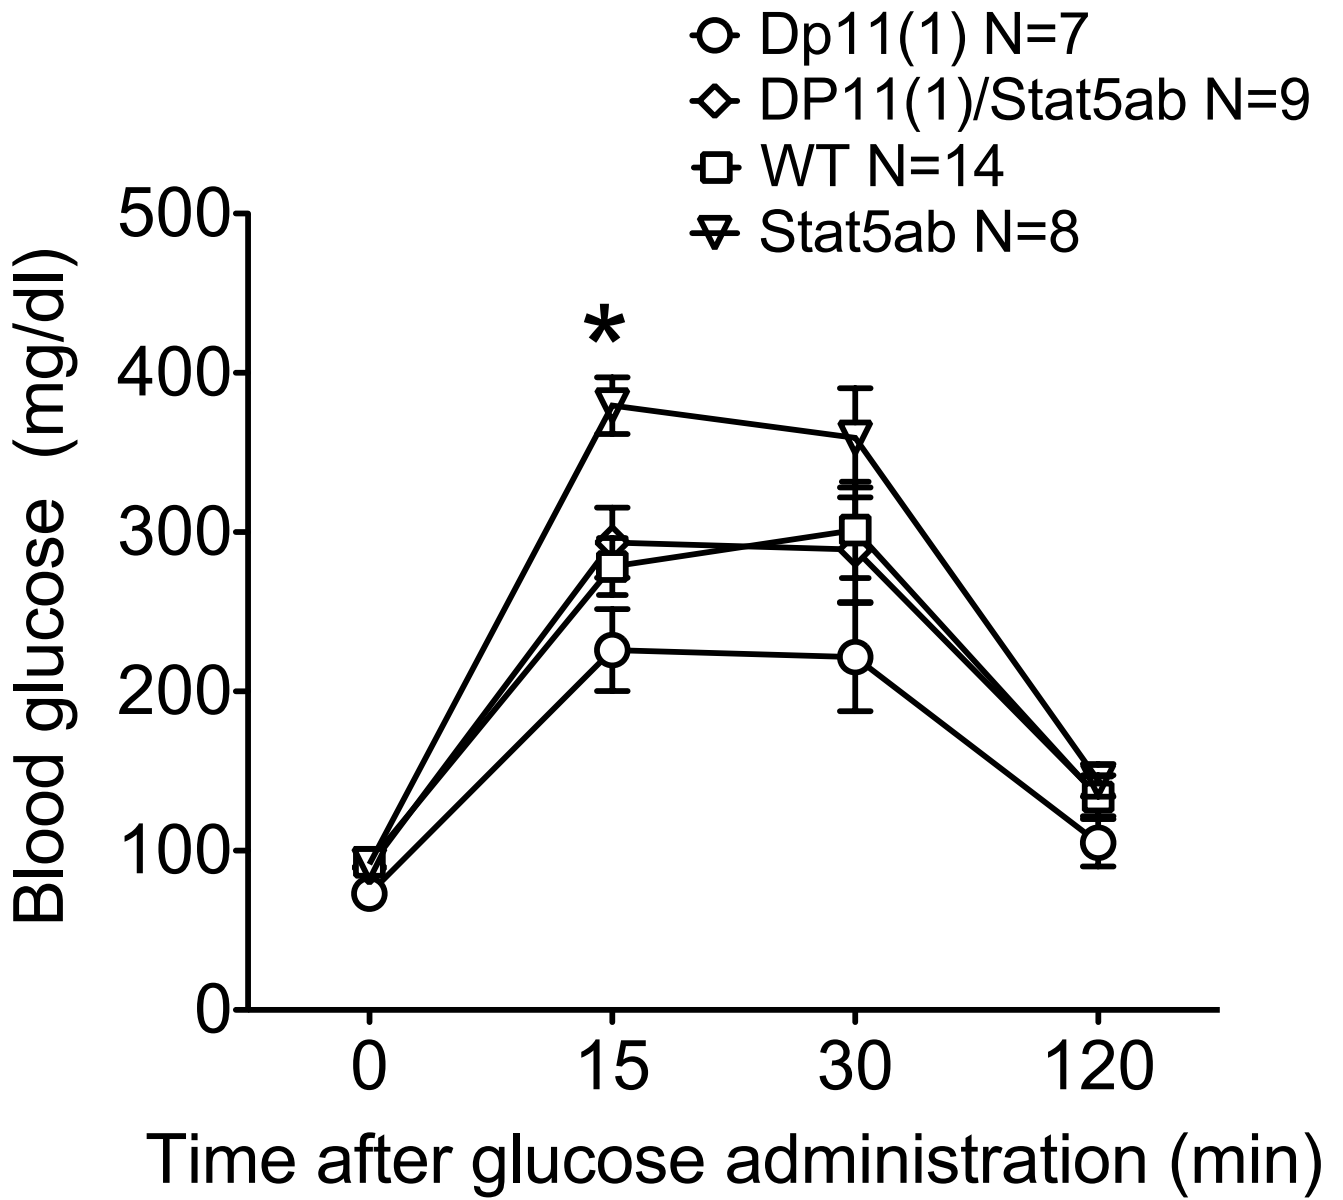

Ermakova et al., Figure S6

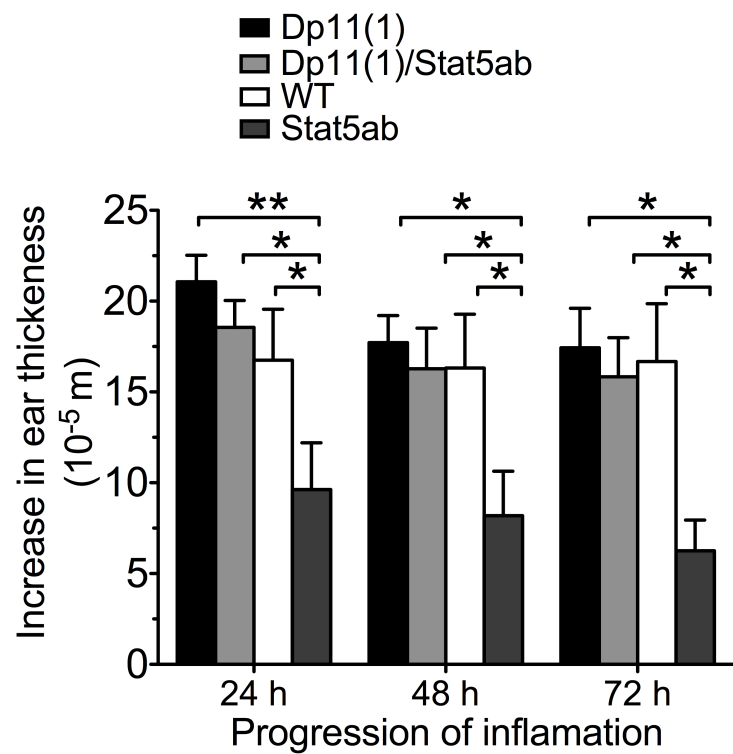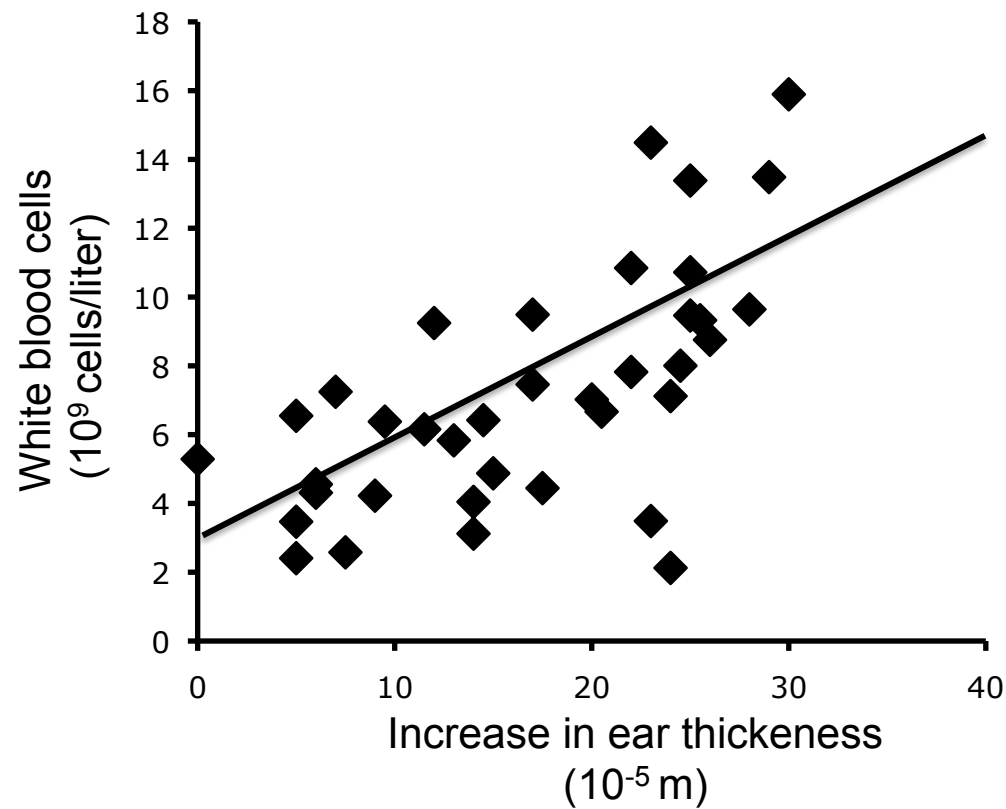

Ermakova et al., Figure S7
